# Supplementary material for: Floating, highly efficient, and scalable graphene membranes for seawater desalination using solar energy
Source: Royal Society of Chemistry journal article supplement (doi:10.1039/c8gc01347k), 2018-01-01
Supplement: c8gc01347k1.pdf [file c8gc01347k1.pdf]

Electronic Supplementary Information for

**Floating, Highly Efficient, and Scalable Graphene Membranes for Seawater  
Desalination using Solar Energy**

Guijun Li, Wing Cheung Law and Kang Cheung Chan

Department of Industrial and Systems Engineering  
Hong Kong Polytechnic University, Hong Kong  
E-mail: [kc.chan@polyu.edu.hk](mailto:kc.chan@polyu.edu.hk)

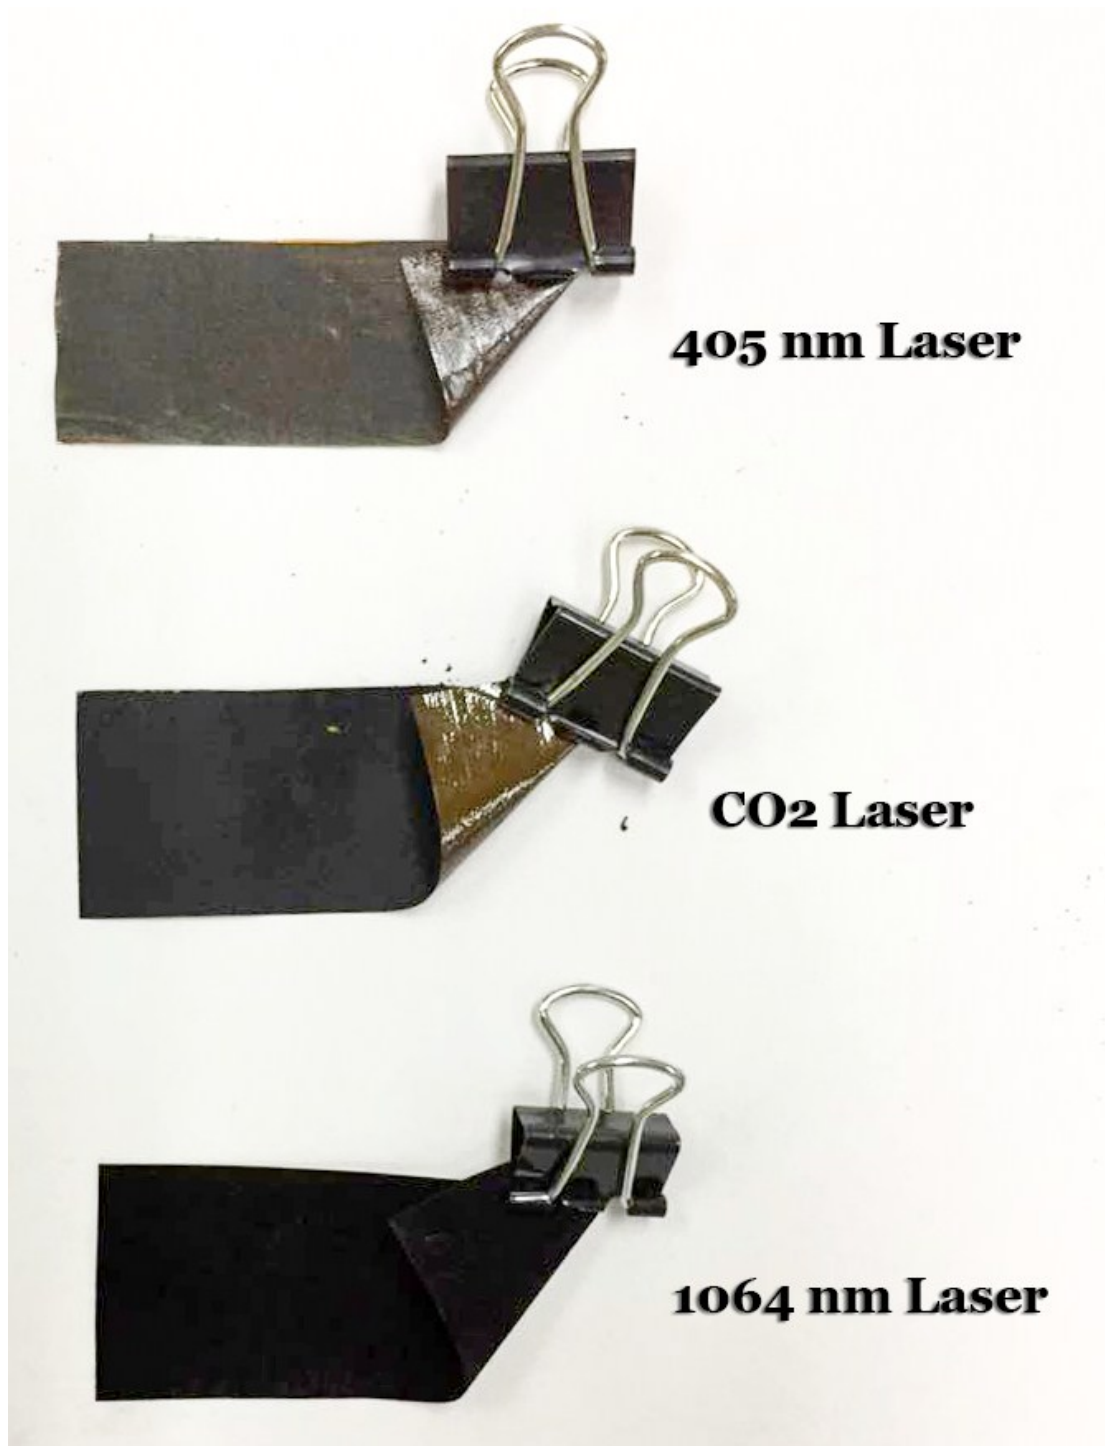

Figure S1. Optical photo of scribed polyimide using 405 nm, CO2 laser and 1064 nm laser, respectively. Only the 1064 nm laser can carbonize the bottom of polyimide.

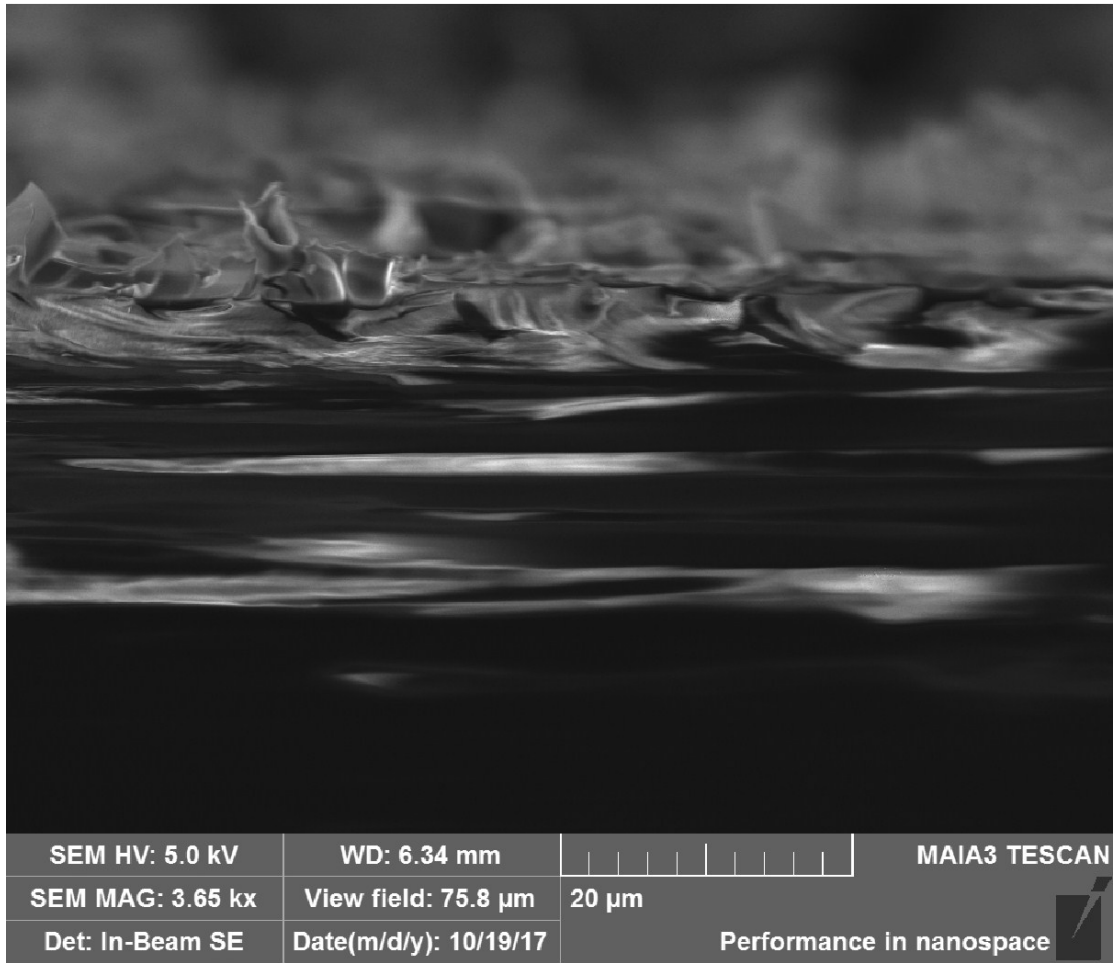

Figure S2. Cross-sectional SEM image of the polyimide after 405 nm laser treatment.

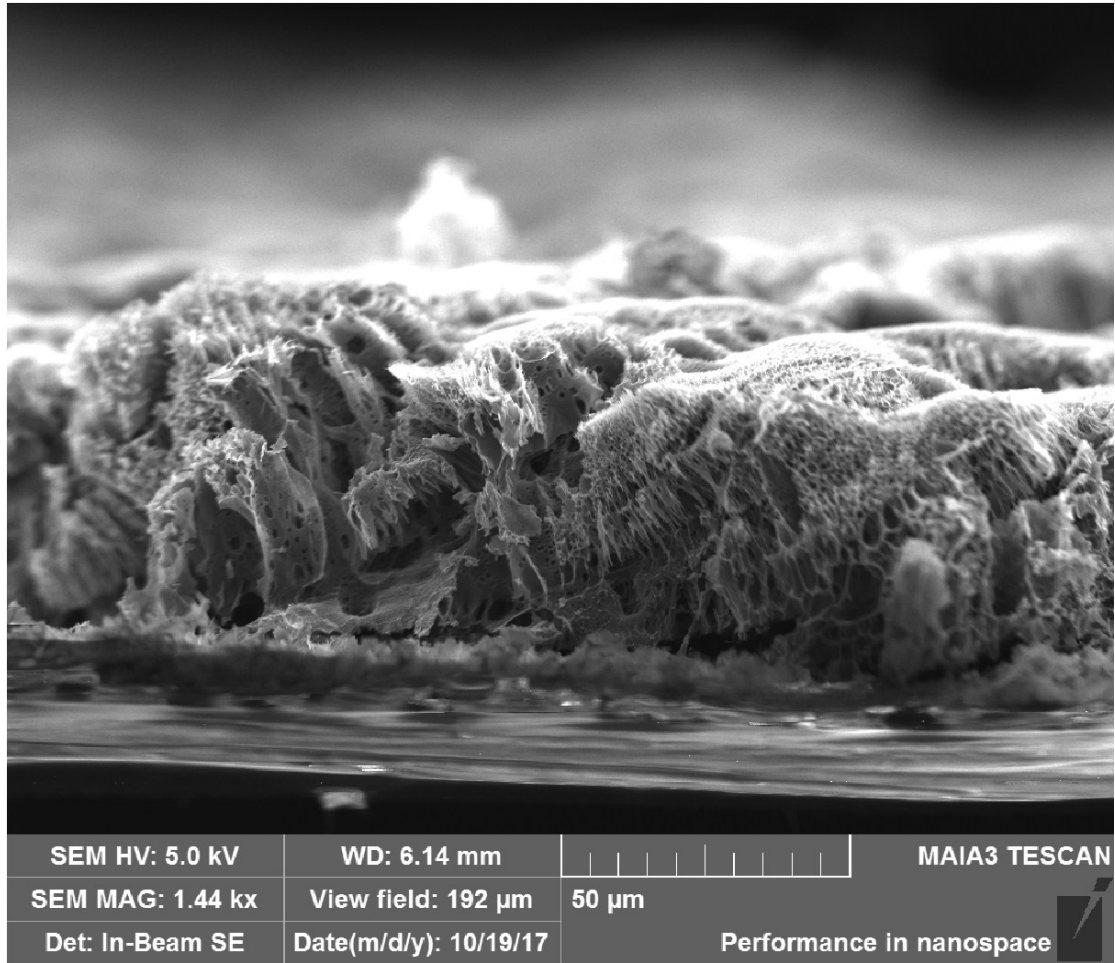

Figure S3 Cross-sectional SEM image of the polyimide after 10,600 nm (CO<sub>2</sub>) laser treatment.

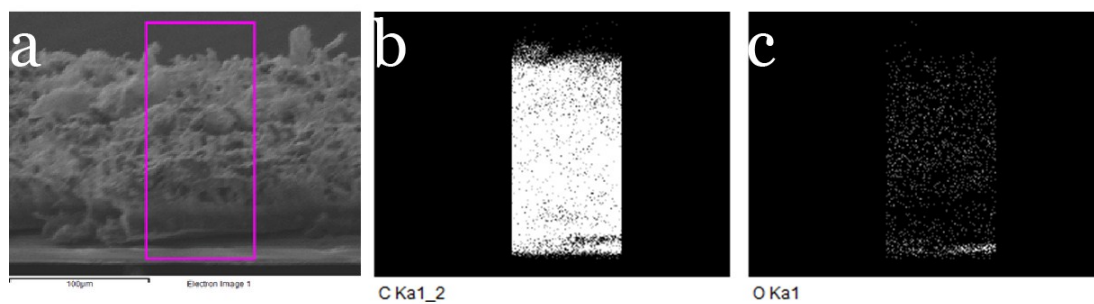

Figure S4. Cross-sectional SEM (a) and EDX mapping of (b) Carbon and (c) Oxygen elements for Janus membranes.

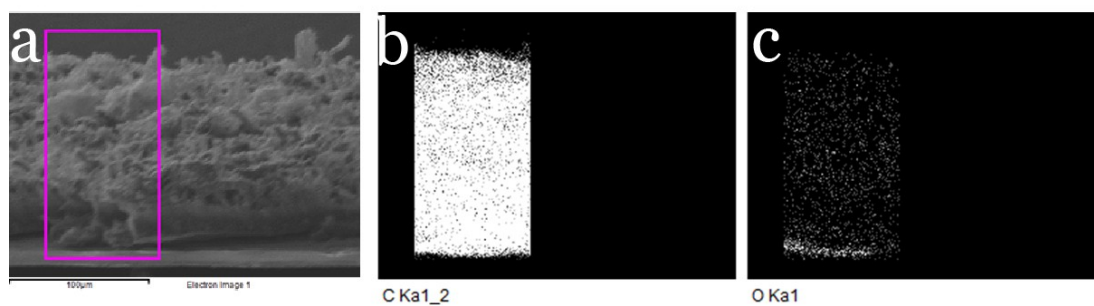

Figure S5. Another cross-sectional SEM (a) and EDX mapping of (b) Carbon and (c) Oxygen elements for Janus membranes at different locations.

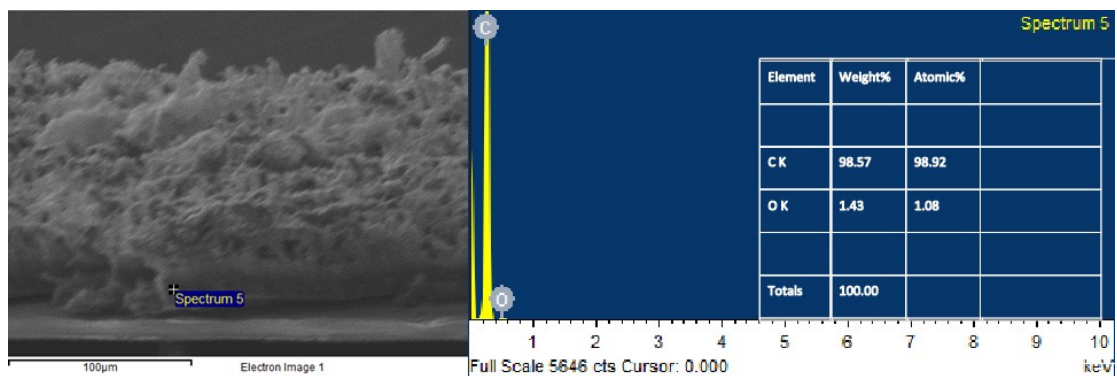

Figure S6. Cross-sectional SEM (a) and EDX (b) of the superhydrophilic part of the Janus membranes.

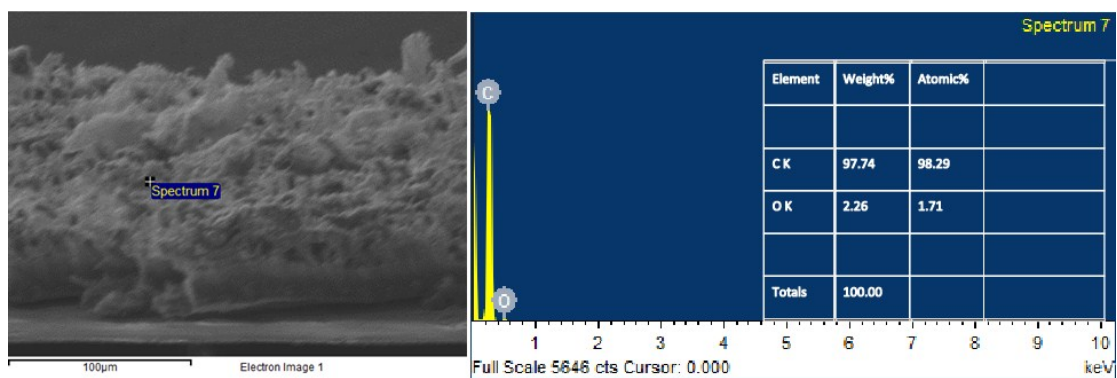

Figure S7. Cross-sectional SEM (a) and EDX (b) of the middle part of the Janus membranes.

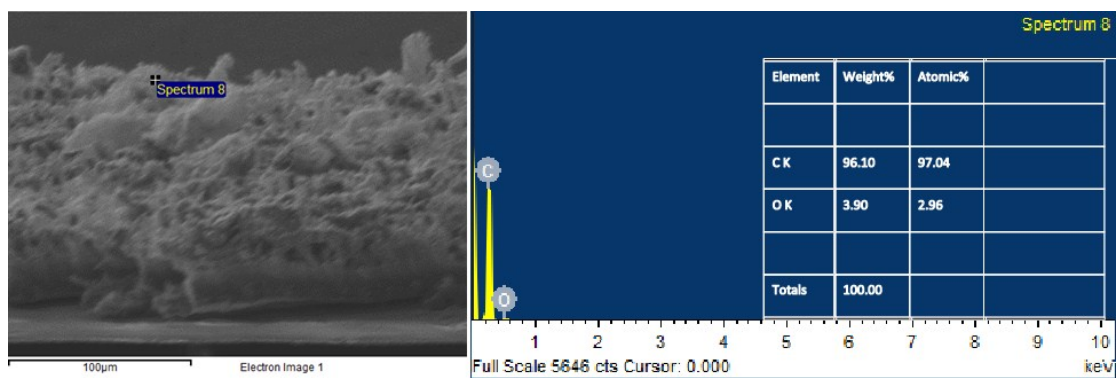

Figure S8. Cross-sectional SEM (a) and EDX (b) of the superhydrophobic part of the Janus membranes.

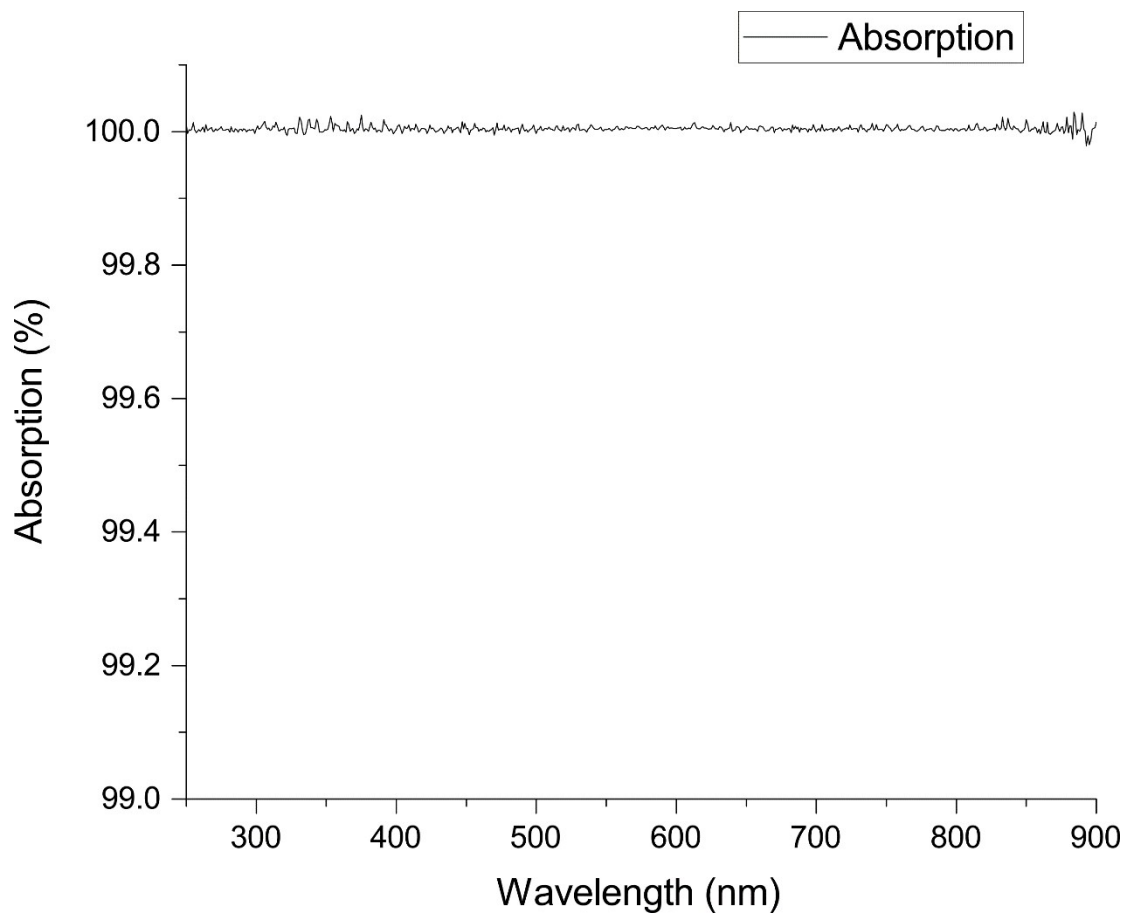

Figure S9. FTIR of the Janus membranes.

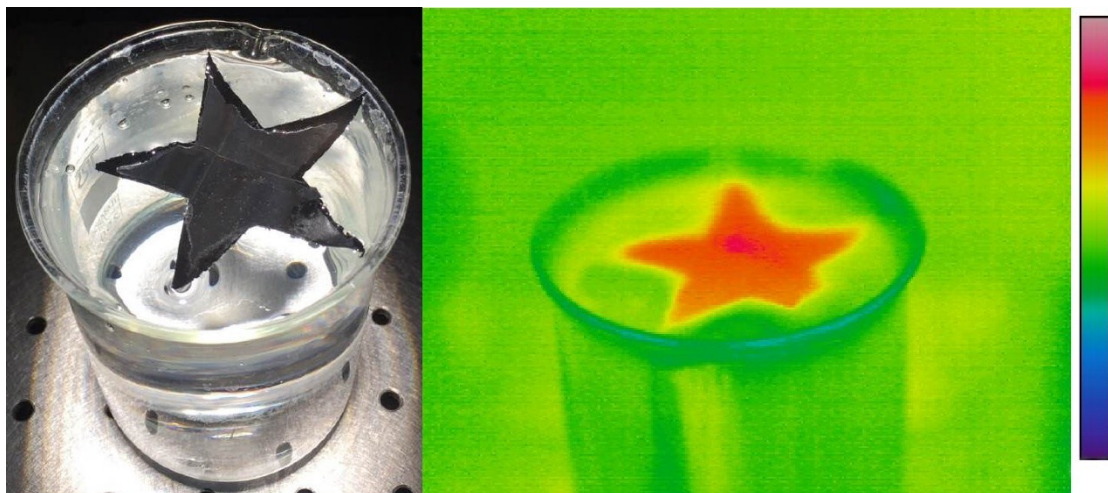

Figure S10. Optical and IR image of a star shape generator under 1 sun illumination.





## Reference

1. H. Ghasemi, G. Ni, A. M. Marconnet, J. Loomis, S. Yerci, N. Miljkovic and G. Chen, *Nat. Commun.*, 2014, **5**, 4449.
2. K. Bae, G. Kang, S. K. Cho, W. Park, K. Kim and W. J. Padilla, *Nat. Commun.*, 2015, **6**, 10103.
3. Y. Ito, Y. Tanabe, J. H. Han, T. Fujita, K. Tanigaki and M. W. Chen, *Adv. Mater.*, 2015, **27**, 4302-4307.
4. Y. M. Liu, S. T. Yu, R. Feng, A. Bernard, Y. Liu, Y. Zhang, H. Z. Duan, W. Shang, P. Tao, C. Y. Song and T. Deng, *Adv. Mater.*, 2015, **27**, 2768-+.
5. L. B. Zhang, B. Tang, J. B. Wu, R. Y. Li and P. Wang, *Adv. Mater.*, 2015, **27**, 4889-4894.
6. X. Q. Li, W. C. Xu, M. Y. Tang, L. Zhou, B. Zhu, S. N. Zhu and J. Zhu, *Proc. Natl. Acad. Sci. U. S. A.*, 2016, **113**, 13953-13958.
7. L. Zhou, Y. L. Tan, D. X. Ji, B. Zhu, P. Zhang, J. Xu, Q. Q. Gan, Z. F. Yu and J. Zhu, *Sci. Adv.*, 2016, **2**, e1501227.
8. L. Zhou, Y. L. Tan, J. Y. Wang, W. C. Xu, Y. Yuan, W. S. Cai, S. N. Zhu and J. Zhu, *Nat. Photonics*, 2016, **10**, 393-399.
9. C. J. Chen, Y. J. Li, J. W. Song, Z. Yang, Y. Kuang, E. Hitz, C. Jia, A. Gong, F. Jiang, J. Y. Zhu, B. Yang, J. Xie and L. B. Hu, *Adv. Mater.*, 2017, **29**, 1701756.
10. X. Z. Hu, W. C. Xu, L. Zhou, Y. L. Tan, Y. Wang, S. N. Zhu and J. Zhu, *Adv. Mater.*, 2017, **29**, 1604031.
11. R. Y. Li, L. B. Zhang, L. Shi and P. Wang, *ACS Nano*, 2017, **11**, 3752-3759.
12. Y. J. Li, T. T. Gao, Z. Yang, C. J. Chen, W. Luo, J. W. Song, E. Hitz, C. Jia, Y.

- B. Zhou, B. Y. Liu, B. Yang and L. B. Hu, *Adv. Mater.*, 2017, **29**, 1700981.
13. H. Y. Ren, M. Tang, B. L. Guan, K. X. Wang, J. W. Yang, F. F. Wang, M. Z. Wang, J. Y. Shan, Z. L. Chen, D. Wei, H. L. Peng and Z. F. Liu, *Adv. Mater.*, 2017, **29**, 1702590.
14. J. Wang, Y. Y. Li, L. Deng, N. N. Wei, Y. K. Weng, S. Dong, D. P. Qi, J. Qiu, X. D. Chen and T. Wu, *Adv. Mater.*, 2017, **29**, 1603730.
15. N. Xu, X. Z. Hu, W. C. Xu, X. Q. Li, L. Zhou, S. N. Zhu and J. Zhu, *Adv. Mater.*, 2017, **29**, 1606762.
16. J. L. Yang, Y. S. Pang, W. X. Huang, S. K. Shaw, J. Schiffbauer, M. A. Pillers, X. Mu, S. R. Luo, T. Zhang, Y. J. Huang, G. X. Li, S. Ptasinska, M. Lieberman and T. F. Luo, *ACS Nano*, 2017, **11**, 5510-5518.
17. M. M. Ye, J. Jia, Z. J. Wu, C. X. Qian, R. Chen, P. G. O'Brien, W. Sun, Y. C. Dong and G. A. Ozin, *Adv. Energy Mater.*, 2017, **7**, 1601811.
18. M. Zhu, Y. Li, G. Chen, F. Jiang, Z. Yang, X. Luo, Y. Wang, S. D. Lacey, J. Dai, C. Wang, C. Jia, J. Wan, Y. Yao, A. Gong, B. Yang, Z. Yu, S. Das and L. Hu, *Adv. Mater.*, 2017, **29**, 1704107.
